# Supplementary material
Source: PubMed Central journal article supplement (PMC4759789)
Supplement: rsif20150768supp1.pdf [file rsif20150768supp1.pdf]

## Calculation of the maximal angle of twist during stag beetle biting

The angle of twist of an object with a uniform cross-section due to a torque  $T$  is:

$$\theta = \text{angle of twist} = \frac{T \cdot l}{J \cdot G}$$

Because the male stag beetle jaws have no uniform cross-section, this formula can only give a rough estimation of its angle of twist.

The necessary parameters are calculated as follows:

$$l = 0.010 \text{ m (see figure below)}$$

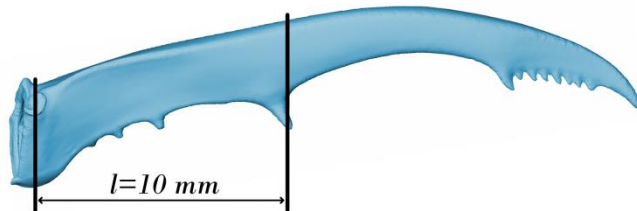

$J = \text{torsion constant} = 1,2 \cdot 10^{-12} \text{ m}^4$  (minimal  $J$  of the jaw base, which is indicated on the figure above)

$G = \text{shear modulus} \approx \frac{E}{2(1+\nu)} = \frac{5,1 \text{ GPa}}{2(1+0,3)} = 2,0 \text{ GPa}$  ( $E$  is the Young's modulus and  $\nu$  the Poisson ratio)

$T = \text{applied torque} = \vec{r} \times \vec{F} = |r| \cdot |F| = 0,0026 \text{ m} \cdot \frac{6,9 \text{ N}}{2} = 0,0089 \text{ Nm}$  ( $F$ : bite reaction force on the large tooth of one jaw, see Goyens et al., 2014, Journal of Experimental Biology;  $r$ : moment arm from slice centroid to the force application point. We assume a right angle between both vectors to arrive at a maximal value.)

Using these values for  $l$ ,  $J$ ,  $G$  and  $T$ , the angle of twist  $\theta$  is:

$$\theta = \text{angle of twist} = \frac{T \cdot l}{J \cdot G} = \frac{0,0089 \text{ Nm} \cdot 0,010 \text{ m}}{1,2 \cdot 10^{-12} \text{ m}^4 \cdot 2,0 \cdot 10^9 \text{ Pa}} = 0.037 \text{ rad} = 2.1^\circ$$

Because the bite force vector  $F$  is usually not directed normally to the moment arm  $r$ , the applied torque will be less than calculated above. Hence, the calculated angle of twist  $\theta$  should be interpreted as an upper limit.
